# Supplementary material
Source: PubMed Central journal article supplement (PMC9553984)
Supplement: 43856_2022_195_MOESM1_ESM.pdf [file 43856_2022_195_MOESM1_ESM.pdf]

## Description of Additional Supplementary Files

---

**File Name:** Supplementary Data 1

**Description:** Longitudinal nasal swab SARS-CoV-2 viral load (qPCR) kinetics dataset (XLS)

**File Name:** Supplementary Data 2

**Description:** Cytokine/chemokine concentration-time profile dataset for participants testing positive nasally for SARS-CoV-2 RNA (XLS)

**File Name:** Supplementary Data 3

**Description:** Longitudinal antibody responses to SARS-CoV-2 in serum samples. Dataset for six participants testing positive for SARS-CoV-2 by qPCR (XLS)

**File Name:** Supplementary Data 4

**Description:** Evaluation of CD8<sup>+</sup> T cell targeting of SARS-CoV-2 in blood samples. Dataset for all participants tested (XLS)
