# Supplementary material
Source: PubMed Central journal article supplement (PMC9553984)
Supplement: 43856_2022_195_MOESM2_ESM.pdf [file 43856_2022_195_MOESM2_ESM.pdf]

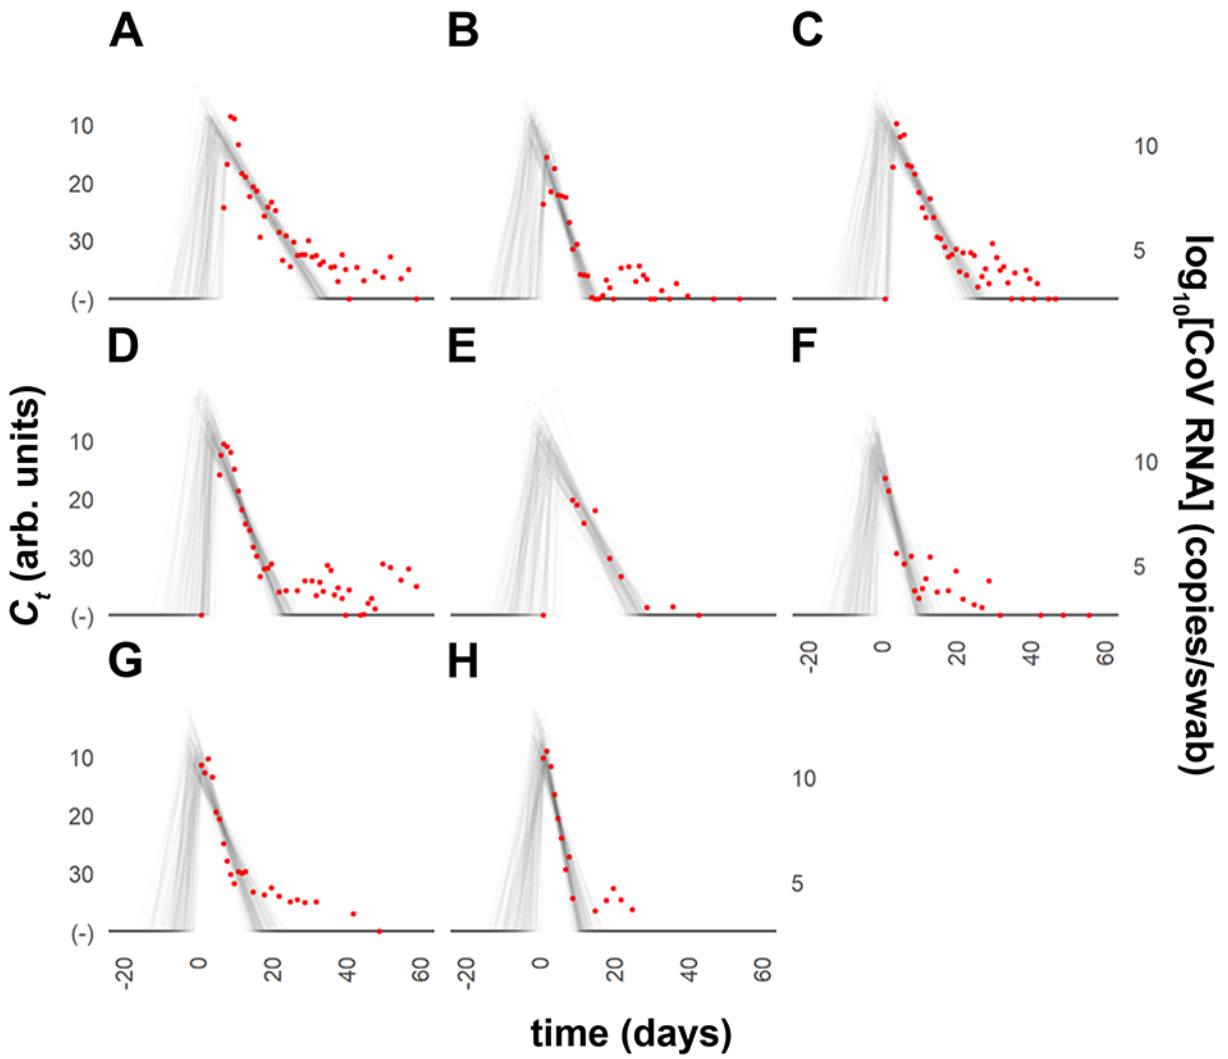

**Supplementary Fig. 1.** Uninformative priors model plots (grey) for  $C_t$  values and estimated trajectories for infections; each red circle corresponds to one observation; T (d) indicates the time since the minimum  $C_t$  value (highest viral load).

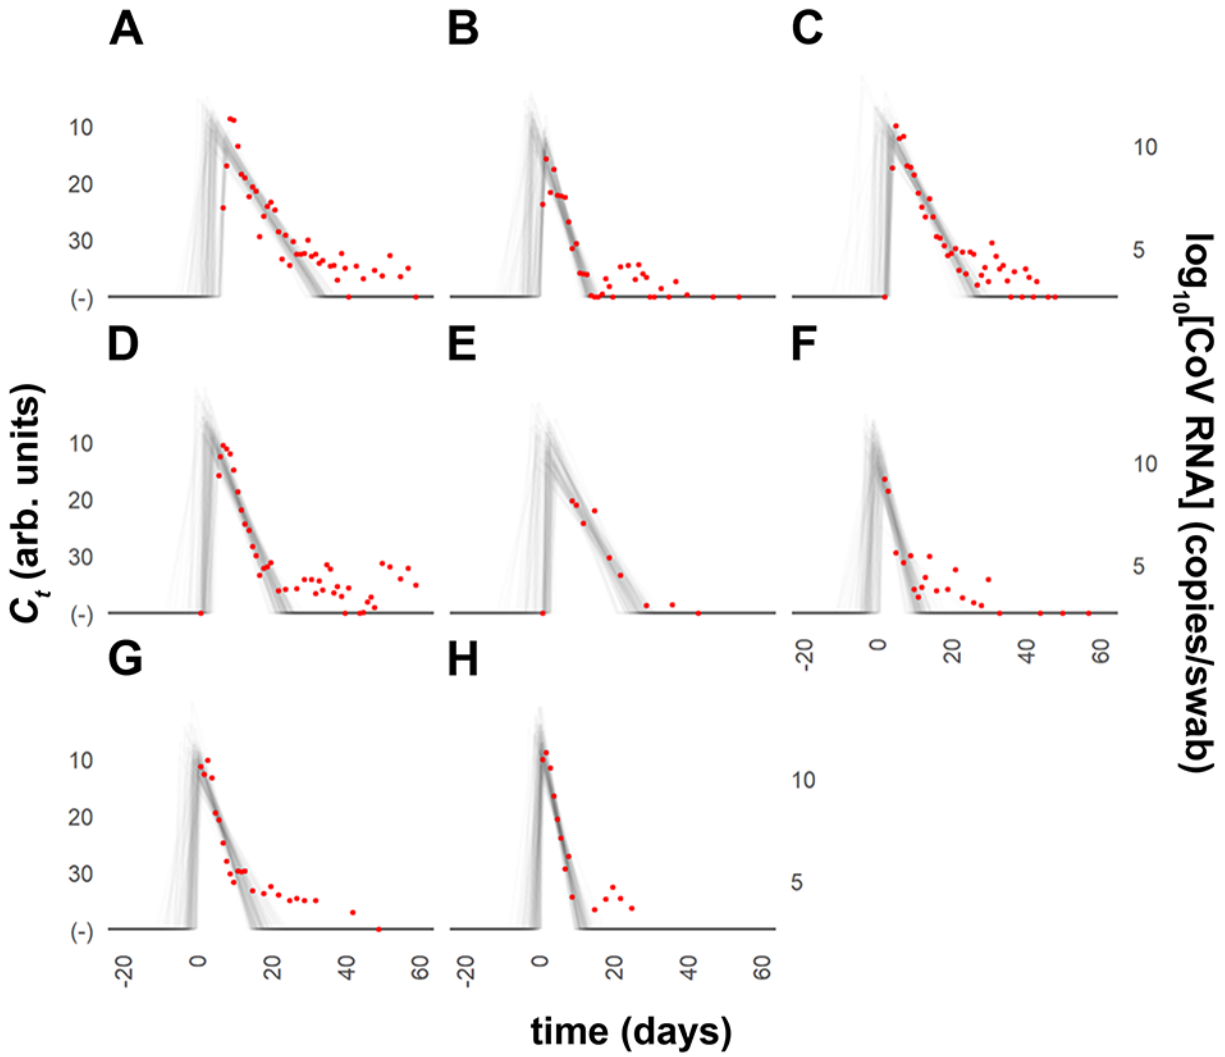

**Supplementary Fig. 2.** Biased set of priors model plots (grey) for  $C_t$  values and estimated trajectories for infections; each red circle corresponds to one observation; T (d) indicates the time since the minimum  $C_t$  value (highest viral load).

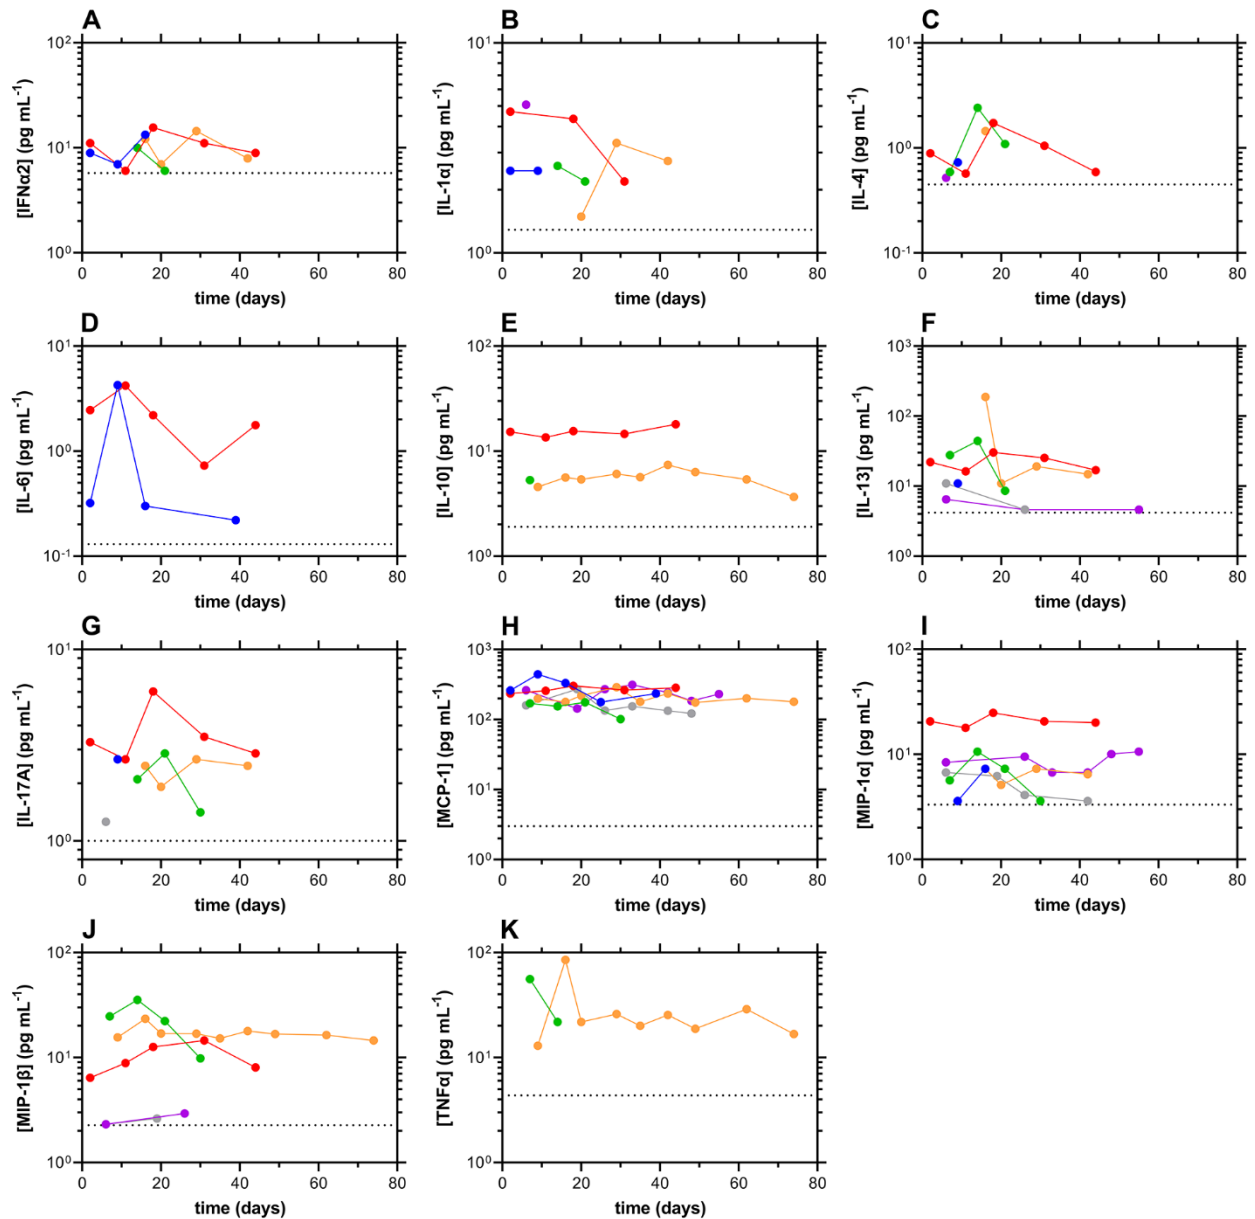

**Supplementary Fig. 3.** Cytokine/chemokine concentration-time profiles for participants testing positive nasally for SARS-CoV-2 RNA, normalized temporally to the first day of positivity. Not all subjects testing positive participated in the blood collection portion of the study. The dotted line represents the assay lower limit of quantitation; blue, subject 2; red, subject 21; green, subject 38; orange, subject 48; magenta, subject 83; grey, subject 84. (A) IFN $\alpha$ 2; (B) IL-1 $\alpha$ ; (C) IL-4; (D) IL-6; (E) IL-10; (F) IL-13; (G) IL-17A; (H) MCP-1; (I) MIP-1 $\alpha$ ; (J) MIP-1 $\beta$ ; (K) TNF $\alpha$ .
